# Supplementary material for: CARD14 Expression in Dermal Endothelial Cells in Psoriasis
Source: PLOS journal article supplement (doi:10.1371/journal.pone.0111255), 2014-11-04
Supplement: S1 (10.1371/journal.pone.0111255.s001) [file journal.pone.0111255.s001]

**Figure S1**

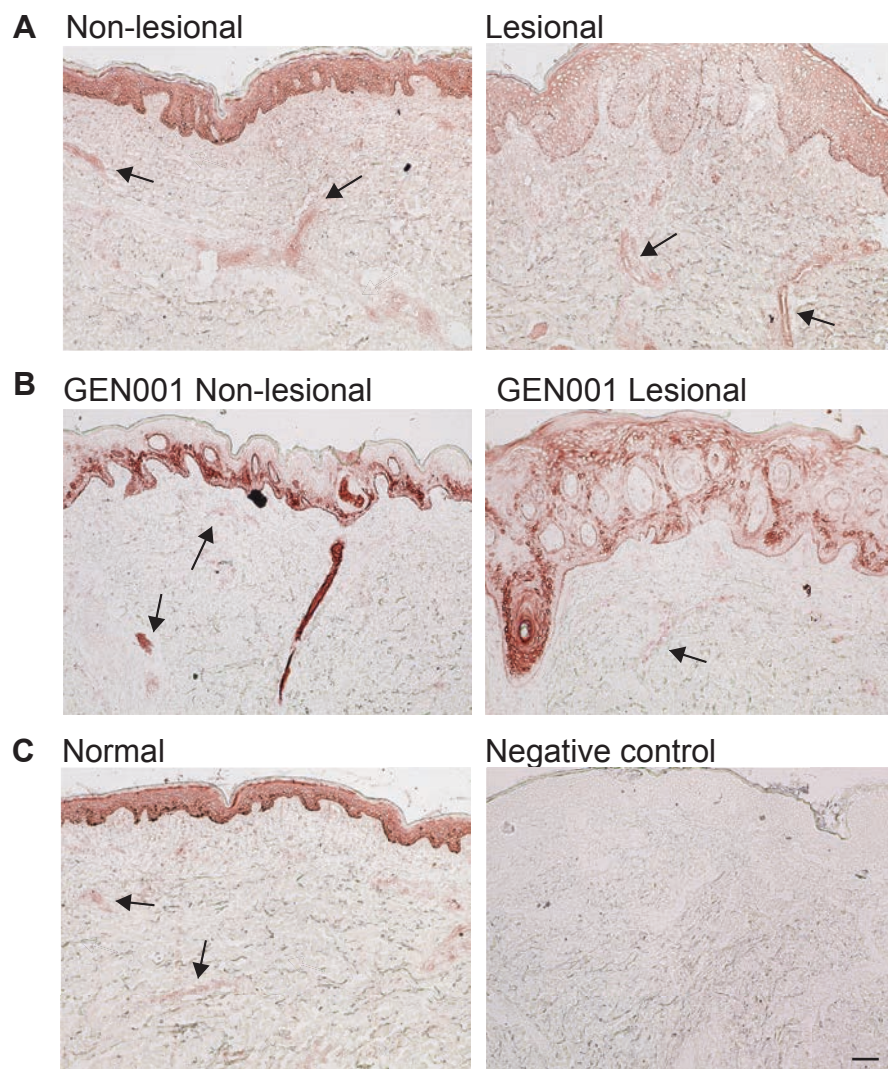

**Figure S1. Dermal Populations of CARD14<sup>+</sup> cells are found in human skin.** Immunohistochemistry for CARD14 on fixed, frozen skin sections of (A) non-lesional and lesional classical psoriasis, (B) non-lesional and lesional skin from patient GEN001, with a confirmed over-active mutation in CARD14 (Jordan CT et al, Am J Hum Genet, 2012 May 4;90(5):784; PMID22521418), and (C) normal human skin. Lower right image is the negative staining control, performed in classical psoriasis lesional skin. Arrows point to dermal CARD14<sup>+</sup> cells. Representative images are shown, bar = 10µm.

**Figure S2**

**A Normal**

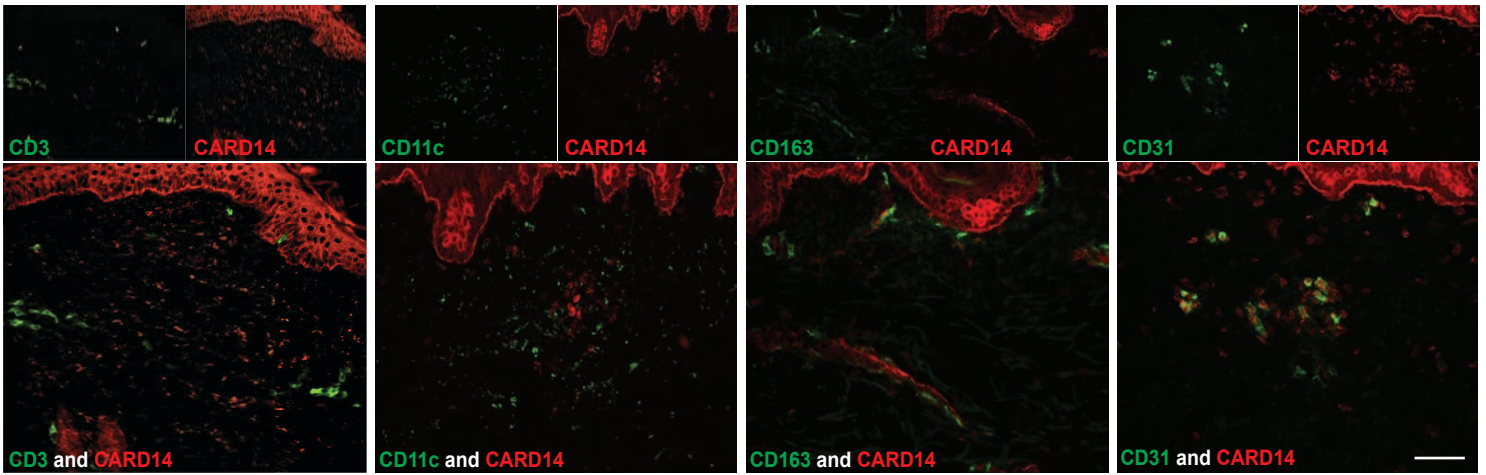

**B Non-lesional**

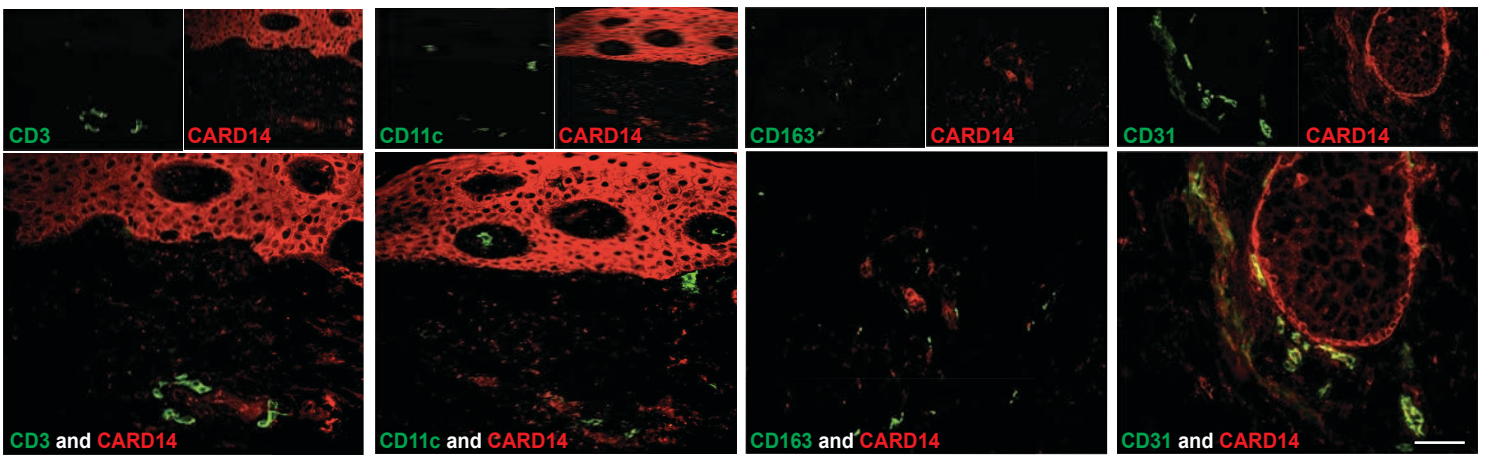

**Figure S2. Dermal CARD14 is expressed in endothelial cells in normal and non-lesional skin.** Two color immunofluorescence on frozen skin sections of (A) normal and (B) non-lesional skin demonstrates that CARD14 (red) does not colocalize with various cell markers (green); CD3 (T-cells), CD11c (dendritic cells), and CD163 (macrophages), but does colocalize with CD31<sup>+</sup> endothelial cells (green) in both normal and non-lesional skin. Representative images shown; bar = 10 $\mu$ m.



Figure S3

**A** Vimentin (Fibroblasts/stromal cells)

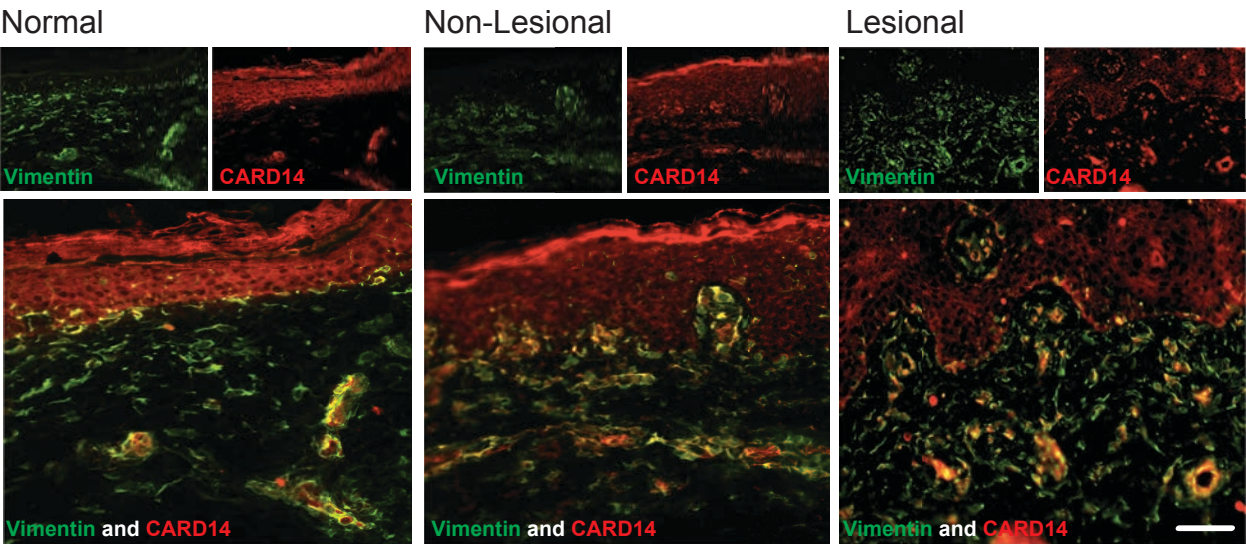

**B** Lesional

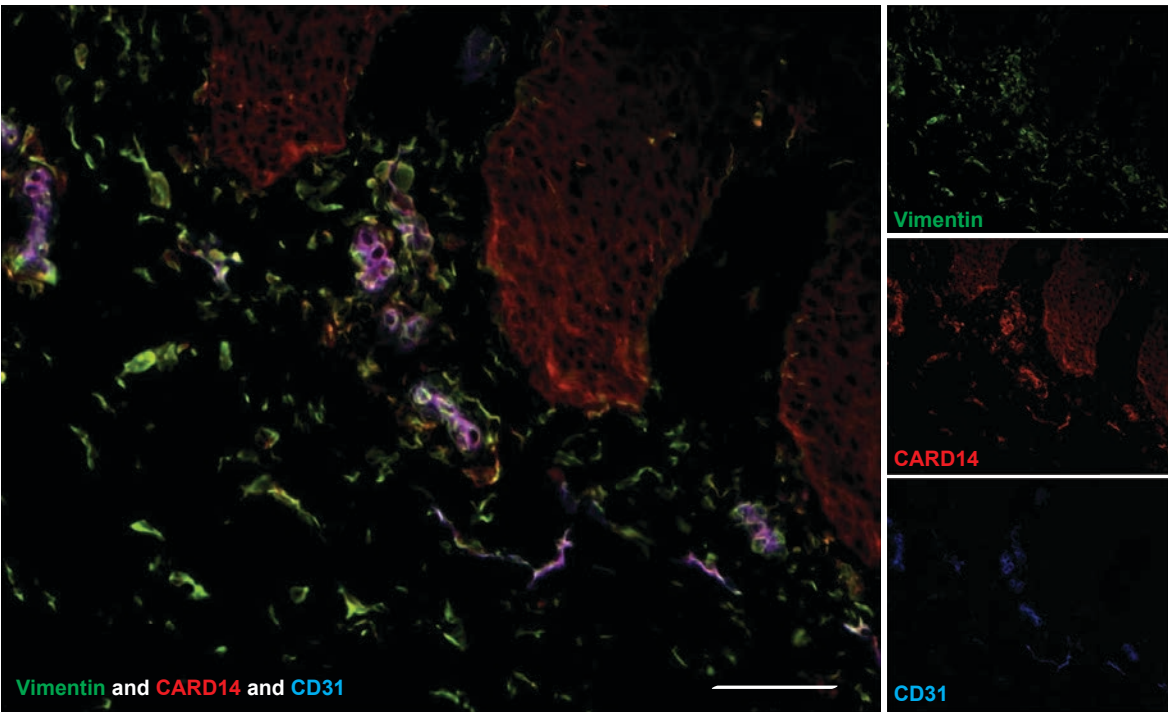

**Figure S3. Dermal CARD14 colocalizes with vimentin<sup>+</sup>CD31<sup>+</sup> cells.** (A) Two-color immunofluorescence demonstrates CARD14 (red) colocalizes with some vimentin (green) cells in normal, non-lesional, and lesional skin. (B) Triple-color immunofluorescence staining in lesional skin demonstrates that the dermal CARD14<sup>+</sup> (red) and vimentin<sup>+</sup> (green), colocalize with the CD31<sup>+</sup> endothelial cells (blue). Representative image shown; bar = 10µm.

**Figure S4**

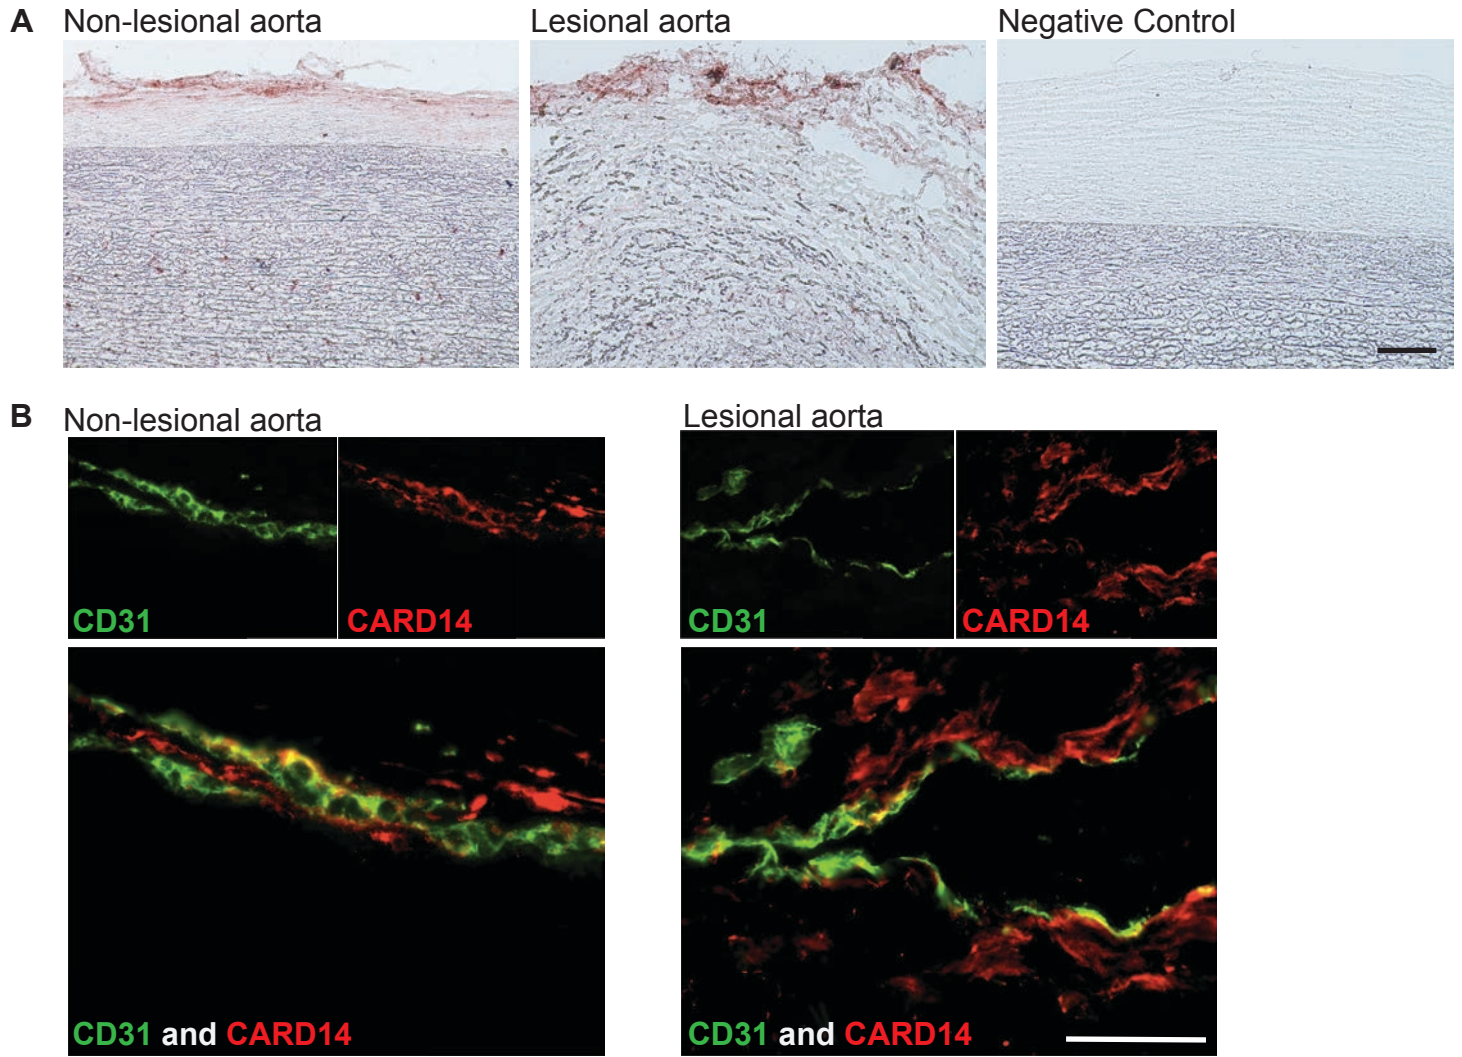

**Figure S4. CARD14 is also expressed in aortic endothelial cells.** (A) Immunohistochemistry for CARD14 on fixed, frozen sections of aorta, obtained from cadavers with athelerosclerotic disease, classified as non-lesional (normal appearing) or lesional (atherlosclerotic) based on macroscopic observation. Negative control shown far right. (B) Two-color immunofluorescence for CD31 (green) and CARD14 (red) in aorta. Representative images are shown; bar = 10 $\mu$ m.

Figure S5

A

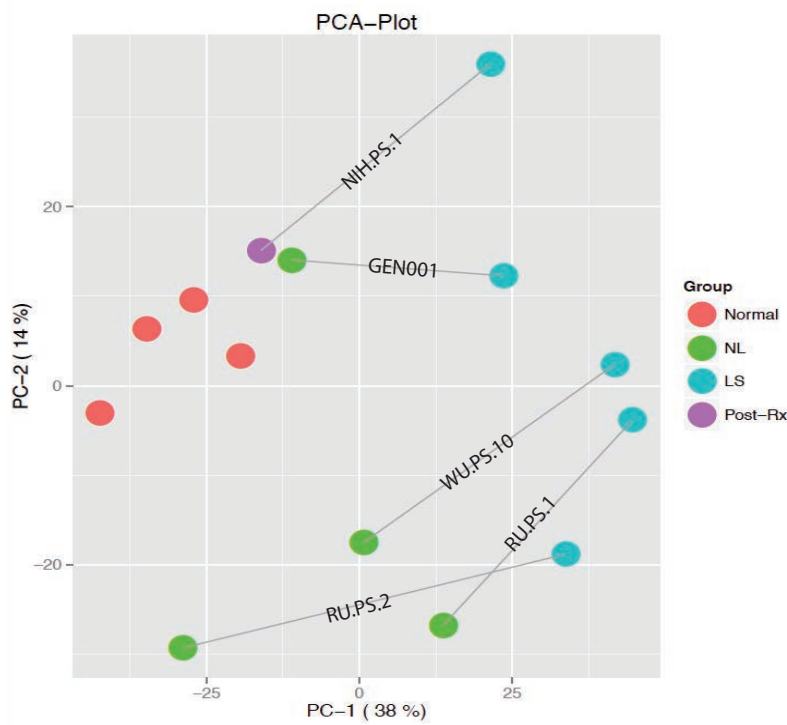

B

Published Psoriasis Gene Sets Enriched in GEN001 (*CARD14* mutation) LS vs NL Transcriptome

| Name                      | Size | ES    | NES   | NOM p-val | FDR q-val | CS   |
|---------------------------|------|-------|-------|-----------|-----------|------|
| Psoriasis_Gudjonsson UP   | 494  | 0.82  | 4.17  | 0         | 0         | 0.78 |
| Psoriasis_Gudjonsson DOWN | 242  | -0.74 | -3.55 | 0         | 0         |      |
| Psoriasis_Yao UP          | 952  | 0.74  | 3.95  | 0         | 0         | 0.71 |
| Psoriasis_Yao DOWN        | 829  | -0.68 | -3.63 | 0         | 0         |      |
| Psoriasis_SF UP           | 568  | 0.77  | 3.94  | 0         | 0         | 0.75 |
| Psoriasis_SF DOWN         | 686  | -0.73 | -3.83 | 0         | 0         |      |
| Psoriasis_Bowcock UP      | 261  | 0.77  | 3.69  | 0         | 0         | 0.70 |
| Psoriasis_Bowcock DOWN    | 388  | -0.63 | -3.13 | 0         | 0         |      |

Published Psoriasis Gene Sets Enriched in NIH(*CARD14* mutation) LS vs post-Rx Transcriptome

| Name                      | Size | ES    | NES   | NOM p-val | FDR q-val | CS   |
|---------------------------|------|-------|-------|-----------|-----------|------|
| Psoriasis_Gudjonsson UP   | 494  | 0.82  | 3.90  | 0         | 0         | 0.78 |
| Psoriasis_Gudjonsson DOWN | 242  | -0.74 | -3.43 | 0         | 0         |      |
| Psoriasis_Yao UP          | 568  | 0.78  | 3.81  | 0         | 0         | 0.71 |
| Psoriasis_Yao DOWN        | 686  | -0.64 | -3.19 | 0         | 0         |      |
| Psoriasis_SF UP           | 952  | 0.74  | 3.75  | 0         | 0         | 0.69 |
| Psoriasis_SF DOWN         | 829  | -0.63 | -3.21 | 0         | 0         |      |
| Psoriasis_Bowcock UP      | 261  | 0.78  | 3.51  | 0         | 0         | 0.65 |
| Psoriasis_Bowcock DOWN    | 388  | -0.52 | -2.48 | 0         | 0         |      |

**Figure S5. Transcriptomic profile of patients with *CARD14* mutations.** (A) Principle Component Analysis (PCA) for the gene expression of normal, LS, and NL or post-treatment biopsies of patients with confirmed *CARD14* mutations (GEN001 and NIH.PS.1) and classical psoriasis (RU and WU samples). (B) Gene Set Enrichment Analysis (GSEA) of published psoriasis upregulated and downregulated transcriptomes (DEGs) compared to gene expression profile of patients with confirmed *CARD14* mutations. cs = connectivity score. Additional information on bioinformatics is located in the Material and Methods

Figure S6.

A

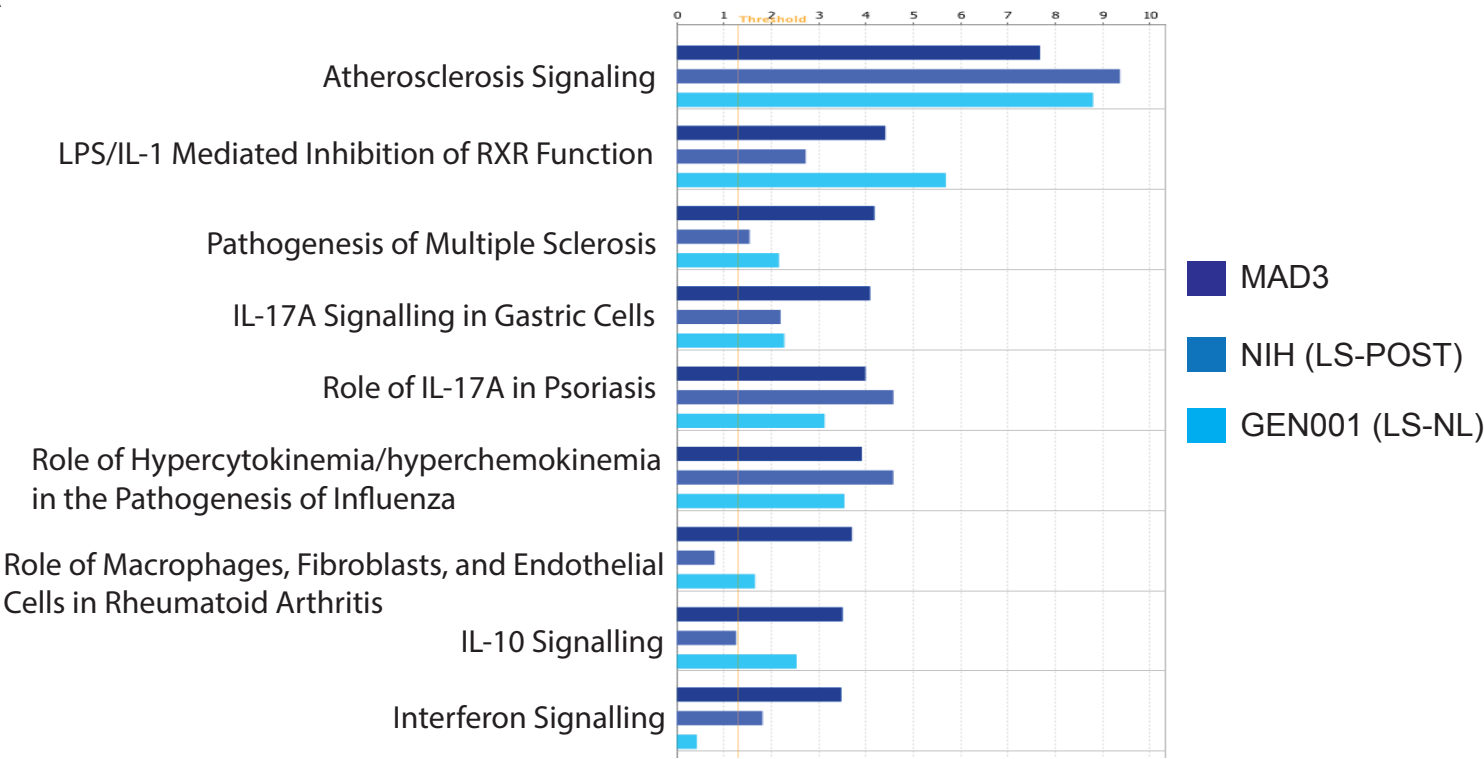

B

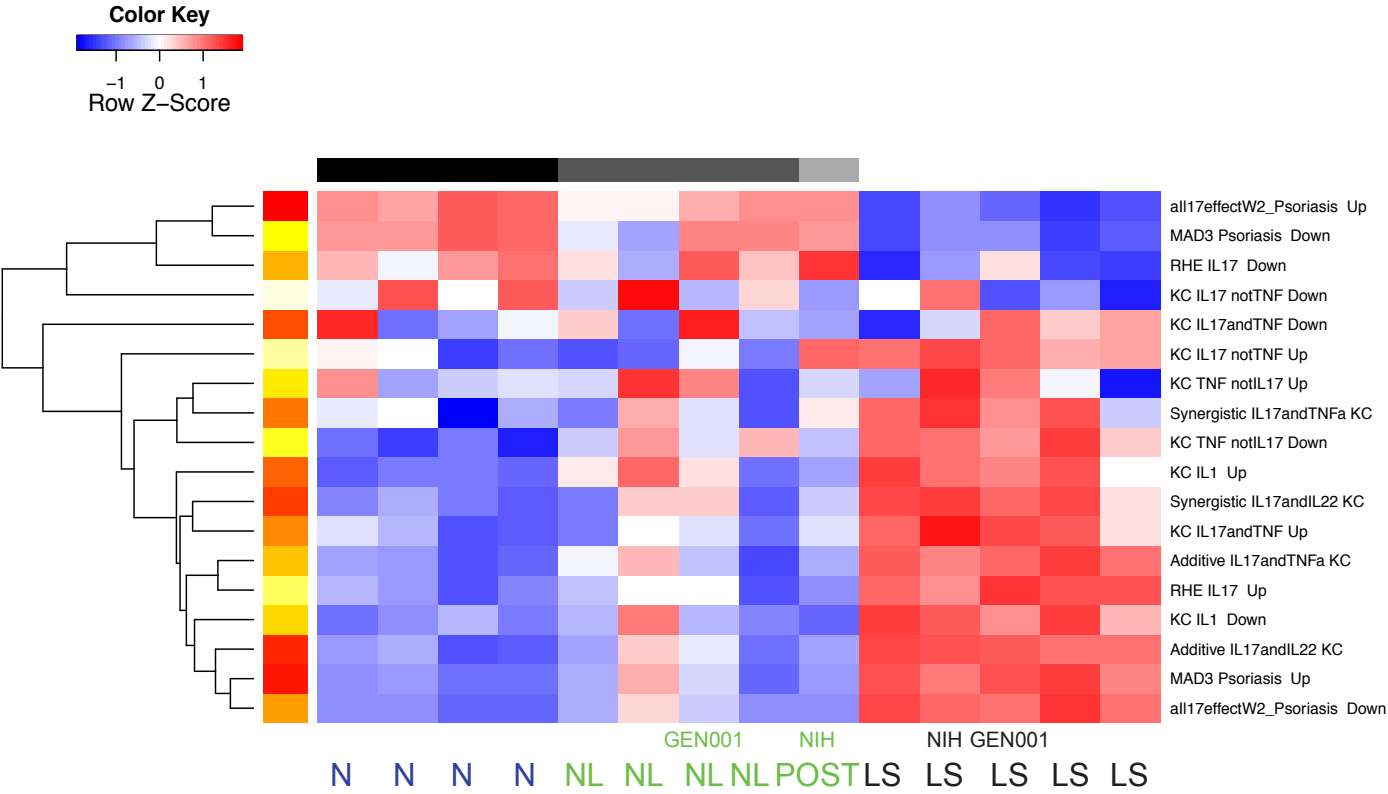

**Figure S6. Transcriptomic profile of patients with CARD14 mutations.** (A) Ingenuity Pathway Analysis (IPA), showing biological pathways significantly upregulated in both classical psoriasis (MAD3) as well as patients with confirmed CARD14 mutations. (B) Heat map of cytokine GSVA (gene set variation analysis)-derived scores in normal, LS, and NL or post-treatment biopsies of patients with confirmed CARD14 mutations (GEN001 and NIH.PS.1) and classical psoriasis. Additional information on bioinformatics is located in the Materials and Methods.

**Figure S7**

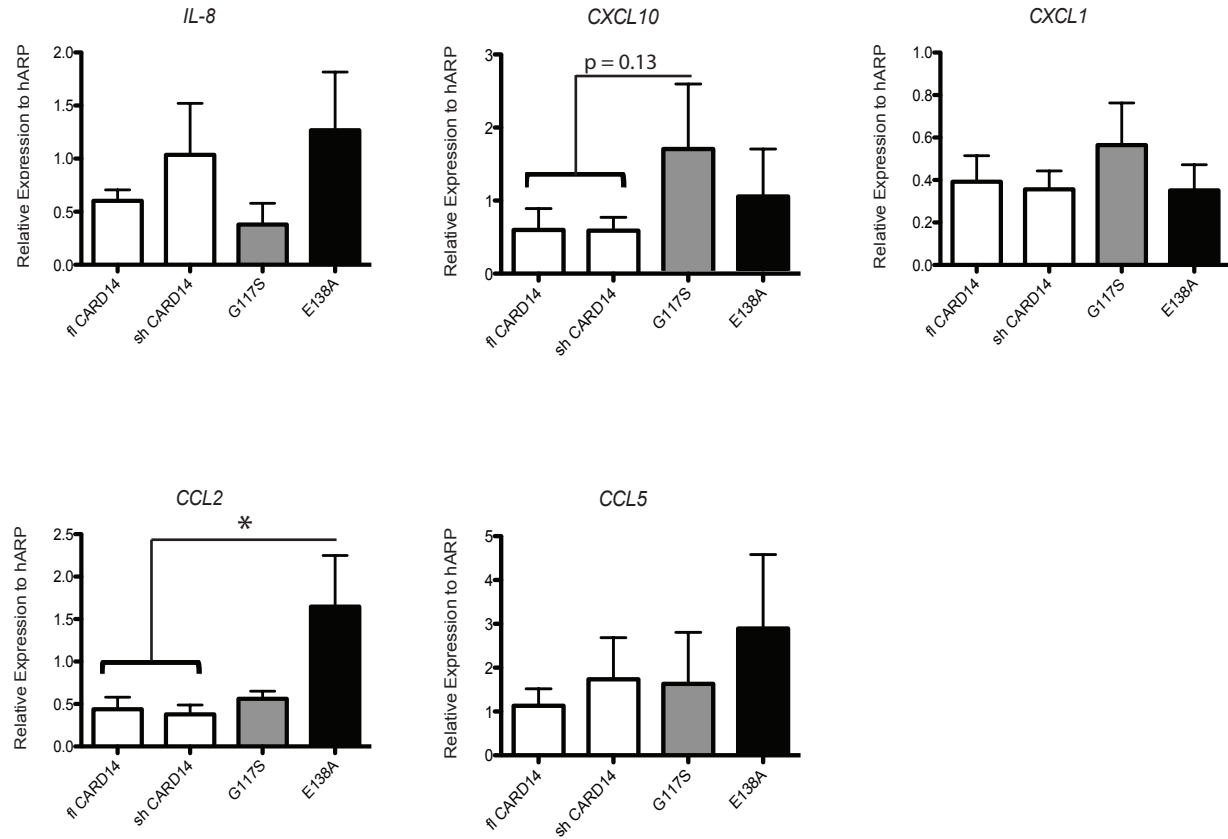

**Figure S7. Transfection of psoriasis-associated CARD14 mutations into dermal endothelial cells resulted in increased expression of several chemokines.**

Quantitative RT-PCR for various chemokines in endothelial cells transfected with wild-type (full-length (fl) and short (sh) CARD14)(white), or psoriasis-associated CARD14 mutation constructs: G117S (gray) and E138A (black). N= 3 per group. Error bars represent the standard error of the mean.



**Figure S8**

**A**

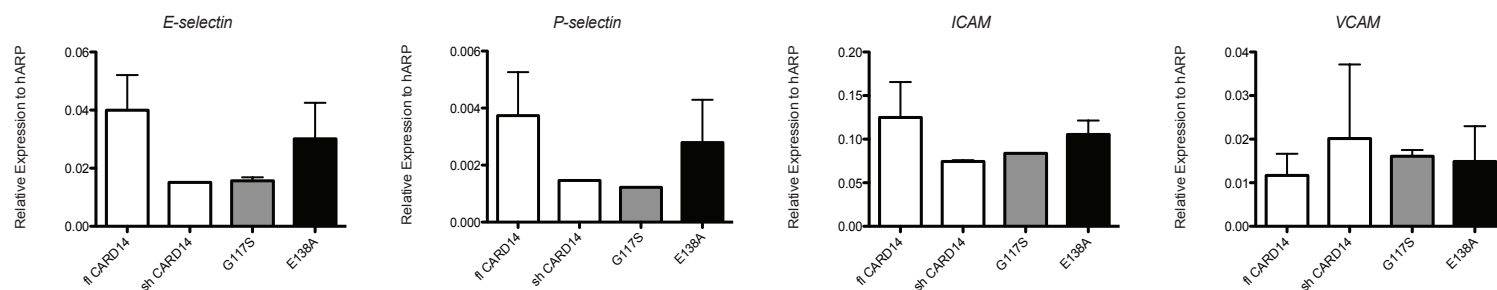

**B**

-- WT CARD14  
— E138A CARD14

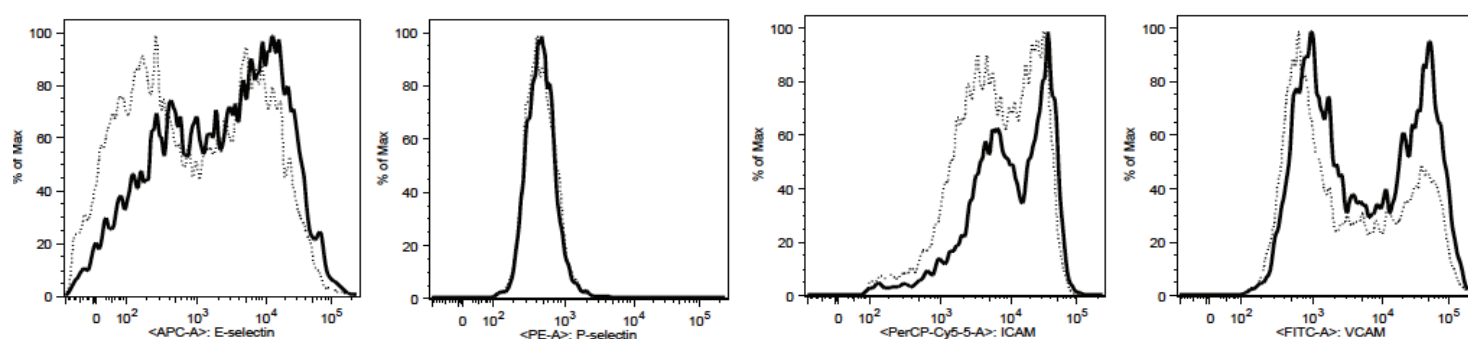

**C**

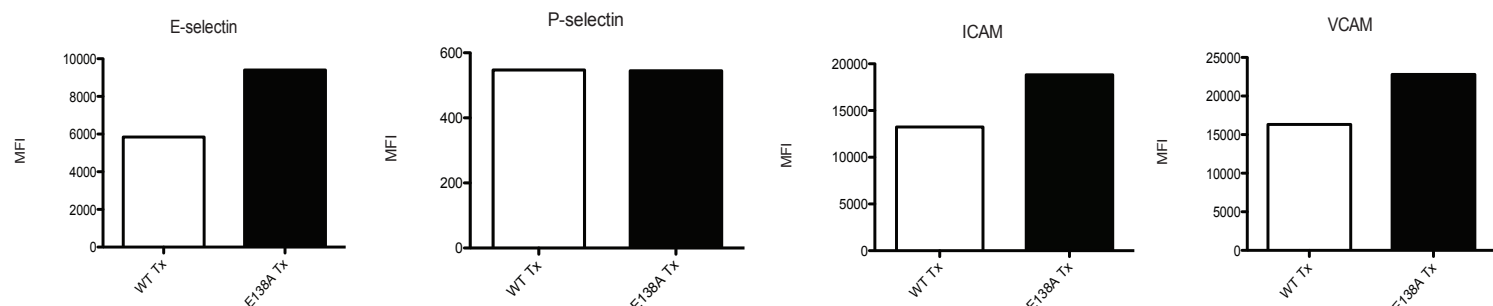

**Figure S8. Minimal upregulation of cell adhesion molecule protein expression on E138A transfected HDBECs.** (A) qRT-PCR analysis of E-selectin, P-selectin, ICAM, and VCAM on wild-type (fl and shCARD14) transfected HDBECs, or HDBECs transfected with psoriasis associated mutations (G117S and E138A). Expression is presented as relative to the housekeeping gene, hARP. N = 2-3 per group. Error bars represent the standard error of the mean. (B) and (C) Expanded HDBECs transfected with the wild-typeCARD14 or the E138A psoriasis-associated CARD14 mutation (N=1) were stimulated with TNF-alpha overnight and then assessed for cell surface protein expression of adhesion molecules by flow cytometry; (B) histograms and (C) corresponding mean fluroescence intensity (MFI) are shown.



**Figure S9**

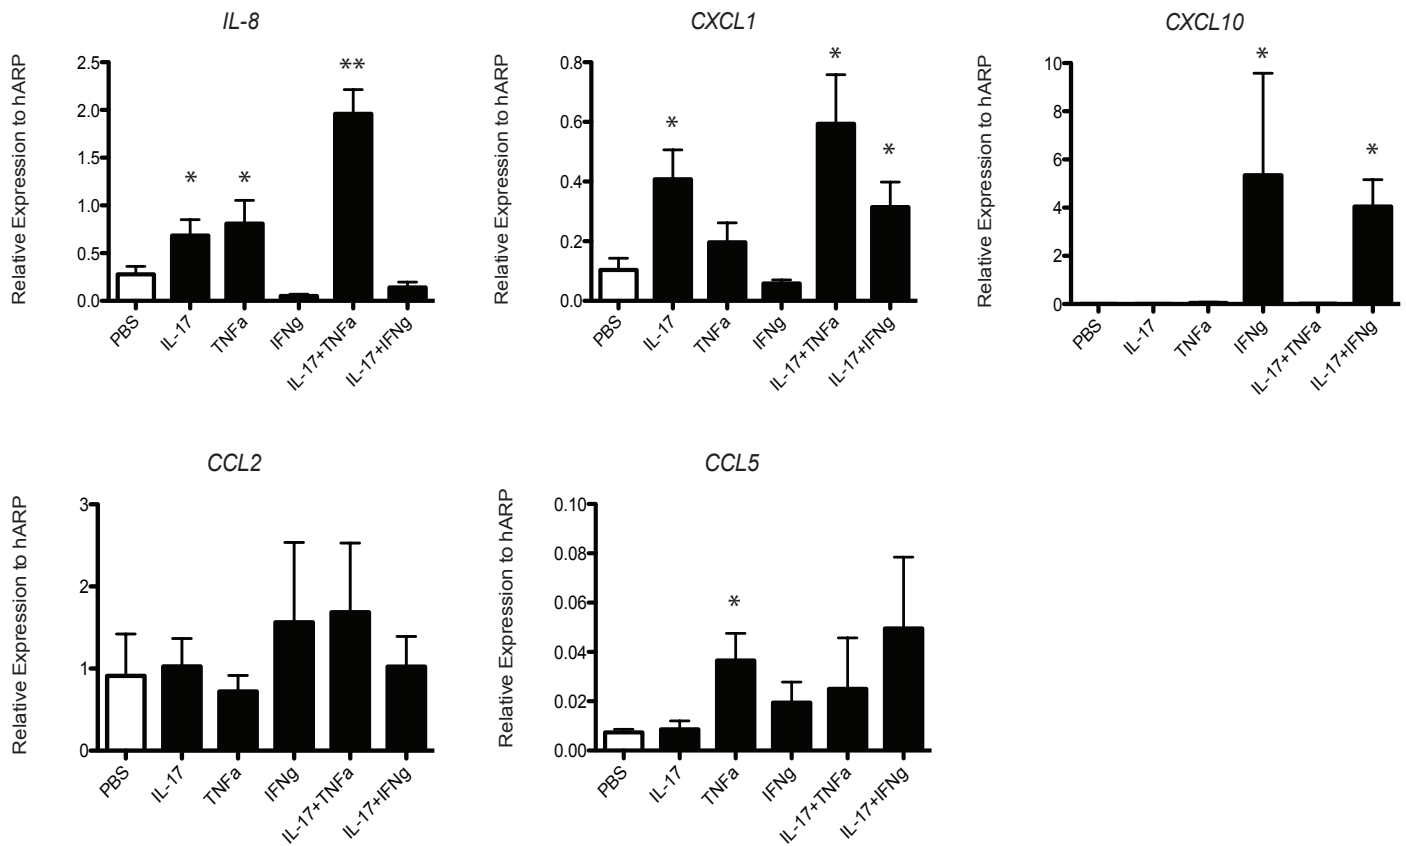

**Figure S9. Psoriatic cytokines upregulate chemokines in dermal blood endothelial cells.** Human dermal blood endothelial cells were cultured with either vehicle control (PBS), IL-17 (100ng/ml), TNF- $\alpha$  (20ng/ml), IFN- $\gamma$  (20ng/ml), or combinations. RNA was isolated after 12 hours of exposure to cytokines, and expression of various chemokines was determined using qRT-PCR (as described in the materials and methods). Error bars represent the standard error of the mean. Significance was determined by comparison of cytokine treatment versus PBS, \*  $p < 0.05$ , \*\* $p < 0.01$  using a paired t-test. N=3.

**Figure S10**

**Controls  
(all at 20X):**

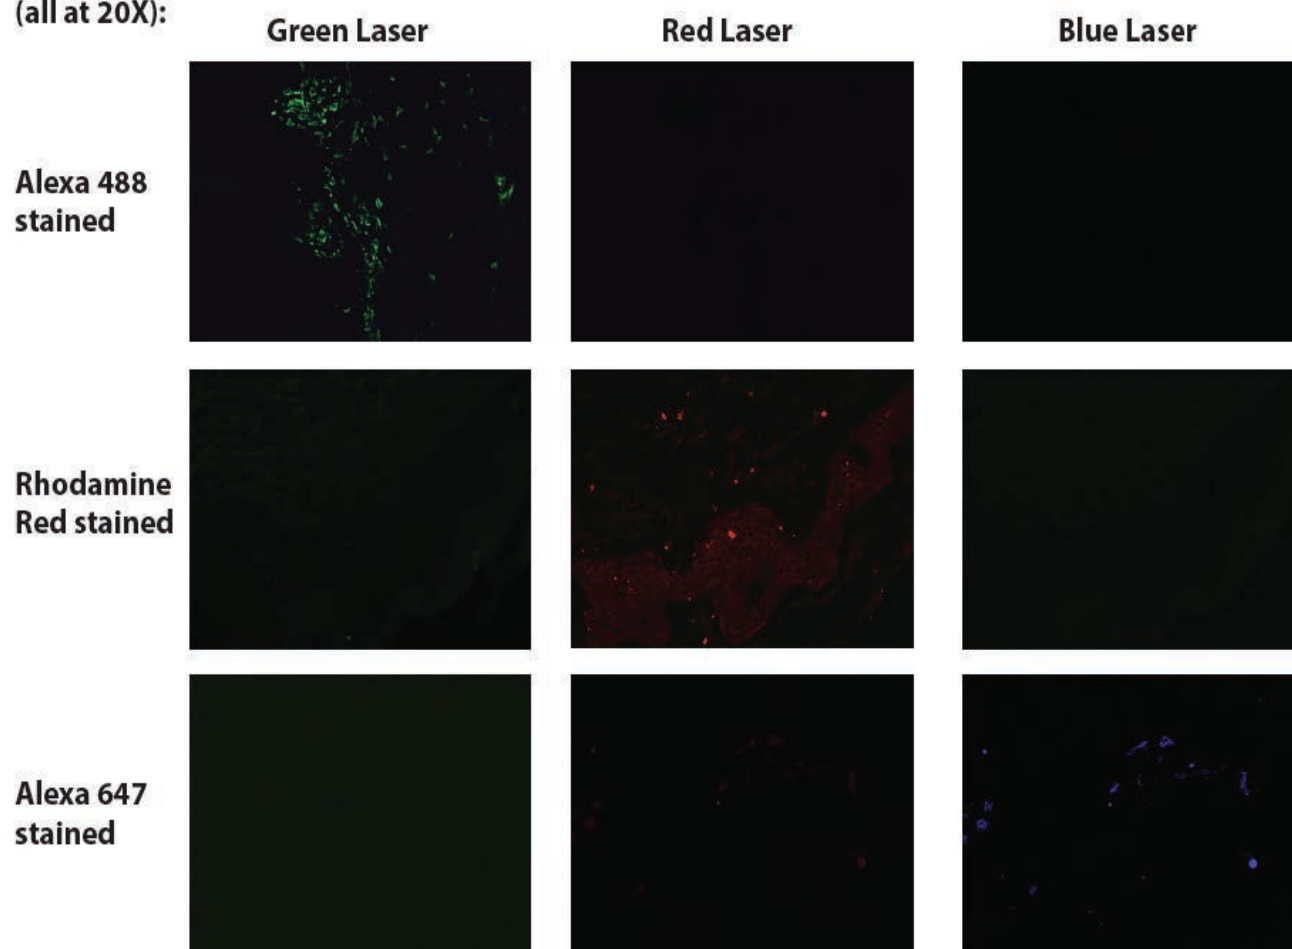

**Figure S10. Single stained flurochrome slide controls for triple-color immunofluorescence studies.** Representative images of each single-flurochrome stained sample using the the green, red, or blue laser are shown at 20X.

Table S1: Antibodies used for immunohistochemistry/immunofluorescence

| Antigen        | Manufacturer      | Clone <sup>a</sup> | Dilution | Amplification/detection (secondary antibodies) |
|----------------|-------------------|--------------------|----------|------------------------------------------------|
| CARD14         | Sigma-Aldrich     | Rabbit polyclonal  | 1:600    | Goat anti-rabbit Ig rhodamine red              |
| CD3            | BD                | SK7                | 1:100    | Goat anti-mouse IgG1 A-488                     |
| CD11c          | BD                | B-ly6              | 1:100    | Goat anti-mouse IgG1 A-488                     |
| CD163-FITC     | Acris             | 5C6-FAT            | 1:100    | Goat anti-mouse IgG FITC                       |
| Vimentin       | Thermo Scientific | Ab2                | 1:100    | Goat anti-mouse IgG1 A-488                     |
| CD31           | BD                | WM59               | 1:100    | Goat anti-mouse IgG1 A-488 or A-647            |
| PAL-E          | abcam             | ab8853             | 1:50     | Goat anti-mouse IgG1 A-488                     |
| LYVE-1         | R&D               | 537028             | 1:200    | Goat anti-mouse IgG1 A-488                     |
| pNFkB (ser276) | Santa Cruz        | Rabbit polyclonal  | 1:100    | Zenon conjugated A-647                         |
| CXCL1          | Acris             | Rabbit polyclonal  | 1:100    | Goat anti-rabbit Ig rhodamine red              |
| CCL2           | Novus Biologicals | MNA1               | 1:100    | Zenon conjugated A-568                         |
| CCL5           | abcam             | VL-1               | 1:200    | Goat anti-mouse IgG2b A-568                    |

<sup>a</sup> All antibodies are murine monoclonal unless otherwise stated.
